# Supplementary material
Source: PubMed Central journal article supplement (PMC4481618)

**A**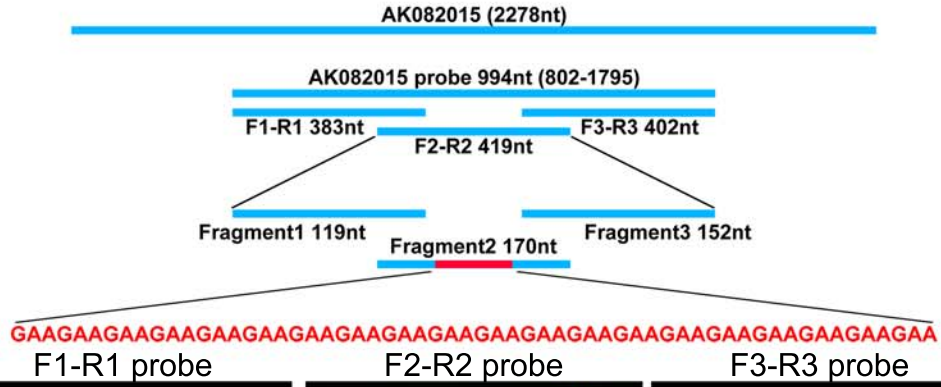**B**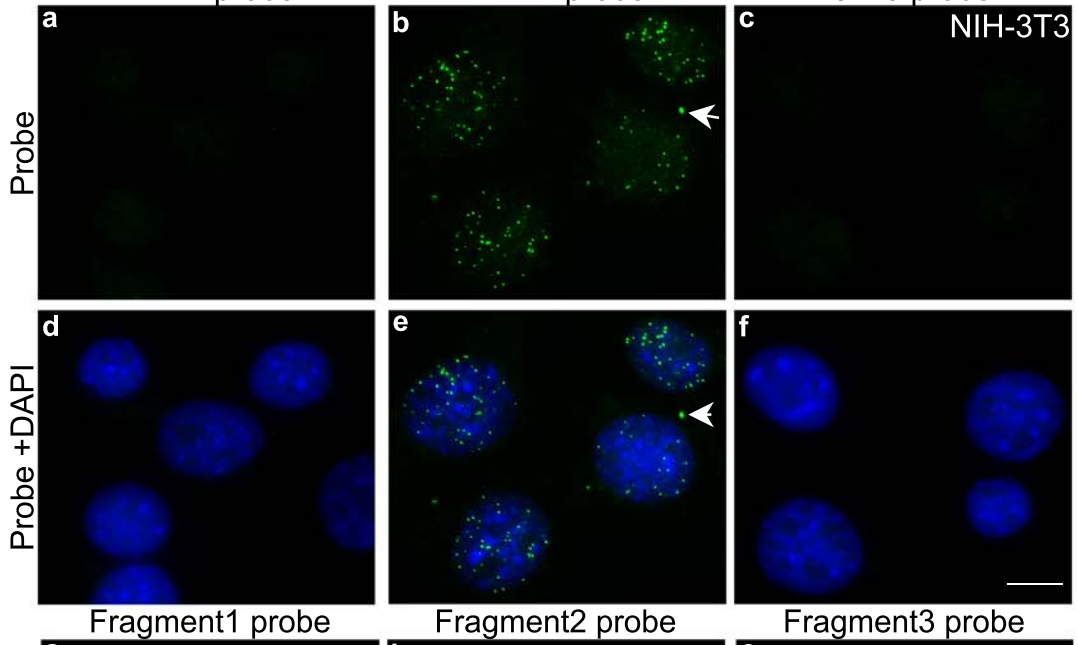**C**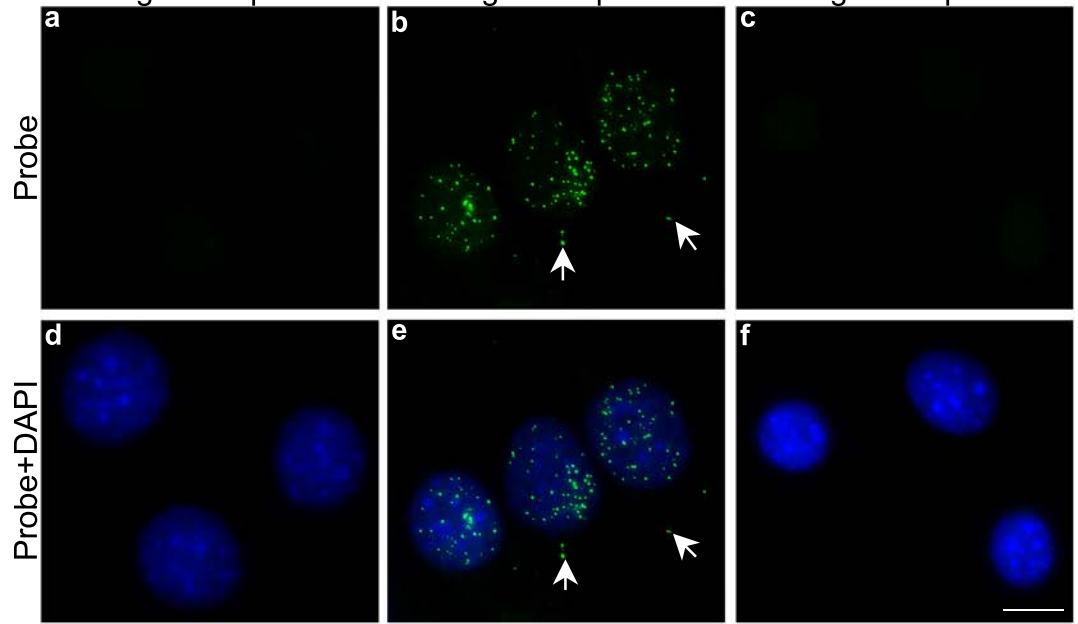

Supplement: supp_123.21.3734_JCS070466FigS1.pdf [file supp_123.21.3734_JCS070466FigS1.pdf]

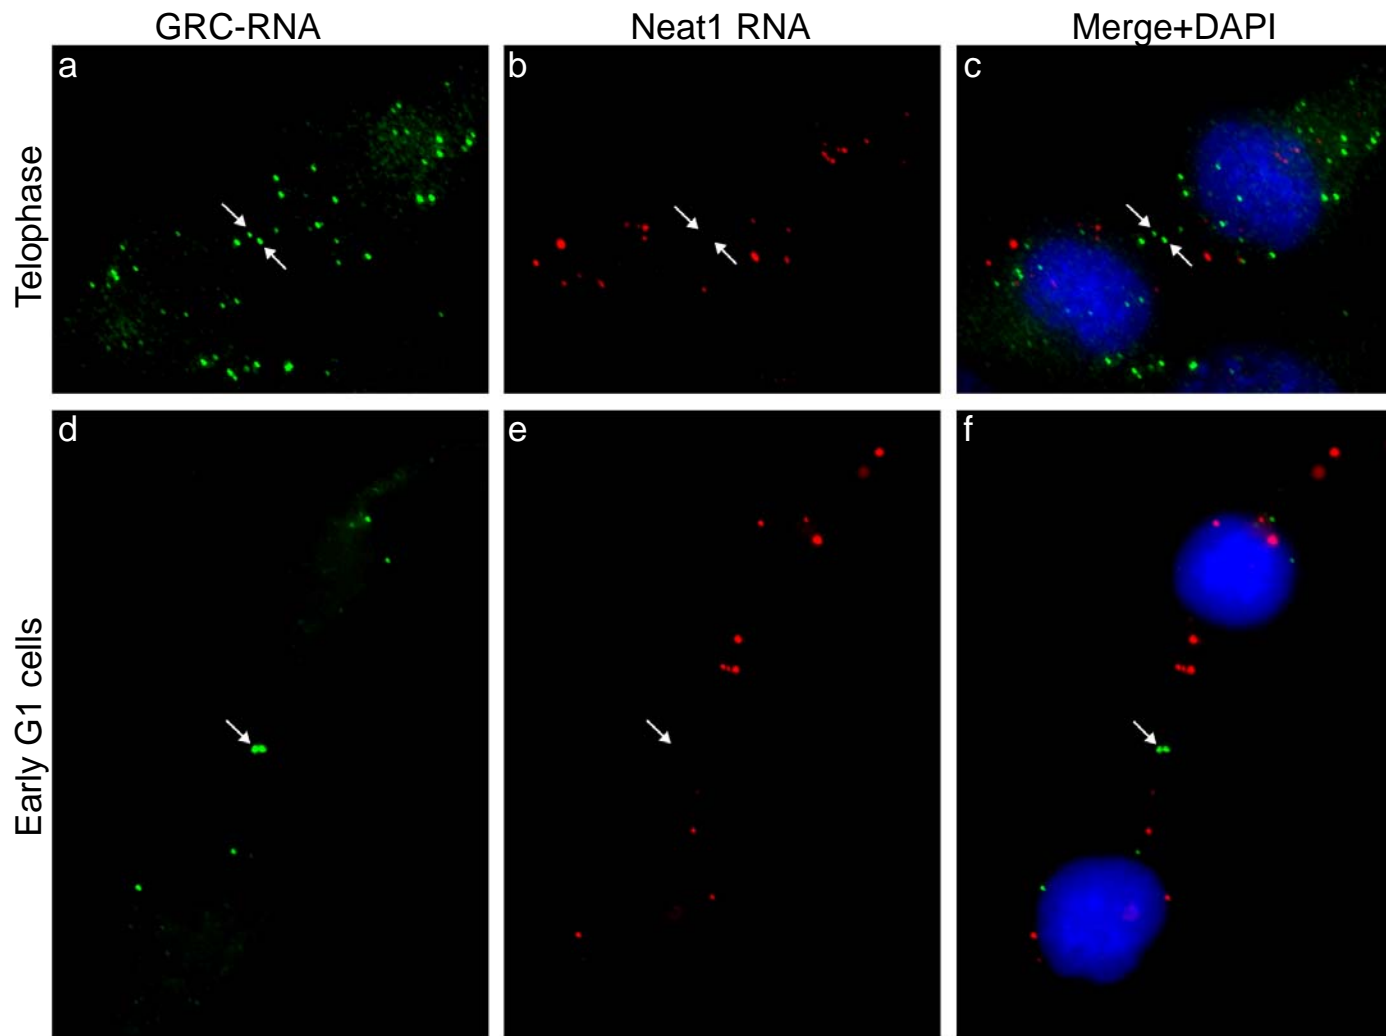

Supplement: supp_123.21.3734_JCS070466FigS7.pdf [file supp_123.21.3734_JCS070466FigS7.pdf]
